# Supplementary material for: A method for managing re-identification risk from small geographic areas in Canada
Source: Springer Nature journal article supplement (doi:10.1186/1472-6947-10-18), 2010-04-02
Supplement: 12911_2009_319_MOESM3_ESM.pdf [file 12911_2009_319_MOESM3_ESM.pdf]

**Actual Risk**

Low Risk

High Risk

Low Risk

 $n_{11}$  $n_{12}$ 

High Risk

 $n_{21}$  $n_{22}$ 

$$\text{Sensitivity} = \frac{n_{22}}{n_{22} + n_{12}}$$

$$\text{Specificity} = \frac{n_{11}}{n_{11} + n_{21}}$$
